# Supplementary material for: The Cdk4-E2f1 pathway regulates early pancreas development by targeting Pdx1+ progenitors and Ngn3+ endocrine precursors
Source: Oxford University Press journal article supplement (doi:10.1242/dev.061481), 2011-04-14
Supplement: dev061481tables2.pdf [file dev061481tables2.pdf]

**Table S2. Quantification of pancreatic transcription factors**

| Genotype                    | Ngn3 <sup>+</sup> | Ki67 <sup>+</sup> Ngn3 <sup>+</sup> | Nkx2.2 <sup>+</sup> | Nkx6.1 <sup>+</sup> |
|-----------------------------|-------------------|-------------------------------------|---------------------|---------------------|
| <i>Cdk4</i> <sup>+/+</sup>  | 71±5              | 11±1                                | 443±38              | 393±11              |
| <i>Cdk4</i> <sup>-/-</sup>  | 50±3*             | 6±1*                                | 195±14*             | 277±10*             |
| <i>Cdk4</i> <sup>R24C</sup> | 88±3*             | 32±3*                               | 688±15*             | 698±40*             |

At E14.5, a quantitative single and colabeling marker analysis was performed on pancreases of the indicated genotypes. By immunofluorescence assay, positive cells were counted on serial sections of pancreas. The numbers presented correspond to the average positive cells per section. *n*>3; \*, *P*<0.05, relative to *Cdk4*<sup>+/+</sup> pancreas.
